# Supplementary material for: Prevalence and risk factors of drug-related hospitalizations in multimorbid patients admitted to an internal medicine ward
Source: PubMed Central journal article supplement (PMC6645516; doi:10.1371/journal.pone.0220071), 2019-07-22
Supplement: pone.0220071.s001.pdf [file pone.0220071.s001.pdf]

**S1 Table. Detailed description of the subgroups of drug-related problems (DRPs).**

| <b>DRP subgroup</b>                          | <b>Detailed description</b>                                                                                                       |
|----------------------------------------------|-----------------------------------------------------------------------------------------------------------------------------------|
| Drug monitoring                              | Need for therapeutic drug monitoring                                                                                              |
| Adverse effects                              | Presence of symptoms or changes in laboratory values possibly caused by drug(s)                                                   |
| Drug-drug interaction                        | Clinically relevant drug-drug interactions                                                                                        |
| Non-optimal drug therapy                     | Lack of drug treatment or non-optimal drug treatment of a symptom/disease                                                         |
| Reduced organ function /<br>contraindication | Drug or dosage of drug inappropriate due to reduced kidney function, reduced liver function, contraindications or other diseases. |
| Inappropriate drug in<br>elderly             | Use of less favourable drugs in patients over 65 years old, e.g. anticholinergics                                                 |
| Unnecessary drug                             | Drug in use is not indicated                                                                                                      |
| Course length                                | Consideration of appropriate duration of course length, e.g. duration of antibiotics                                              |
| Practical problem                            | Practical challenges in drug handling, e.g. inhalation devices                                                                    |
| Adherence issue                              | Patient do not, intentional or unintentional, use / take drug as agreed                                                           |
| Other                                        | DRPs not applicable in other subgroups, e.g. prescription errors, documentation errors                                            |
