# Supplementary material for: Prevalence and risk factors of drug-related hospitalizations in multimorbid patients admitted to an internal medicine ward
Source: PubMed Central journal article supplement (PMC6645516; doi:10.1371/journal.pone.0220071), 2019-07-22
Supplement: pone.0220071.s002.pdf [file pone.0220071.s002.pdf]

**S2 Table. Overview of the variant alleles (mutations) of the various pharmacogenes included in the genotyping panels and the respective genotype-predicted aberrant phenotypes required for gene-drug interaction (GDI) assessments.**

| Gene        | Variant allele panel                                                                                                                                                                                                                                                                                                                                                                                                                                                                                                             | Genotype-predicted aberrant phenotypes                                                                                                                                                                                                                                                                         |
|-------------|----------------------------------------------------------------------------------------------------------------------------------------------------------------------------------------------------------------------------------------------------------------------------------------------------------------------------------------------------------------------------------------------------------------------------------------------------------------------------------------------------------------------------------|----------------------------------------------------------------------------------------------------------------------------------------------------------------------------------------------------------------------------------------------------------------------------------------------------------------|
| CYP2D6 [1]  | <p>Non-coding variant alleles:</p> <ul style="list-style-type: none"> <li>• 2D6*3 (rs35742686)</li> <li>• 2D6*4 (rs3892097)</li> <li>• 2D6*6 (rs5030655)</li> </ul> <p>Reduced-function variant alleles:</p> <ul style="list-style-type: none"> <li>• 2D6*9 (rs5030656)</li> <li>• 2D6*10 (rs1065852)</li> <li>• 2D6*41 (rs29001518)</li> </ul> <p>Copy number analysis:</p> <ul style="list-style-type: none"> <li>• 2D6*5 (whole gene deletion)</li> <li>• multiplication of fully-functional alleles (2D6*1 or *2)</li> </ul> | <p>‘Poor metabolizers’ (PMs): Homozygous carriers of non-coding alleles</p> <p>‘Intermediate metabolizers’ (IMs): Heterozygous carriers of non-coding alleles and homozygous carriers of reduced-function alleles</p> <p>‘Ultrarapid metabolizers’ (UMs): Carriers of three or more functional gene copies</p> |
| CYP2C19 [1] | <p>Non-coding variant alleles:</p> <ul style="list-style-type: none"> <li>• 2C19*2 (rs4244285)</li> <li>• 2C19*3 (rs4986893/rs57081121)</li> <li>• 2C19*4 (rs28399504)</li> </ul> <p>Gain-of-function allele:</p> <ul style="list-style-type: none"> <li>• CYP2C19*17 (rs12248560)</li> </ul>                                                                                                                                                                                                                                    | <p>PMs: Homozygous carriers of non-coding alleles</p> <p>IMs: Heterozygous carriers of non-coding alleles</p> <p>UMs: Hetero- or homozygous carriers of the gain-of-function allele</p>                                                                                                                        |
| CYP2C9 [1]  | <p>Reduced-function alleles:</p> <ul style="list-style-type: none"> <li>• 2C9*2 (rs1799853)</li> <li>• 2C9*3 (rs1057910)</li> </ul>                                                                                                                                                                                                                                                                                                                                                                                              | <p>PMs: Homozygous carriers of CYP2C9*3</p> <p>IMs: Heterozygous carriers of CYP2C9*3 and homozygous carriers of CYP2C9*2</p>                                                                                                                                                                                  |
| CYP3A5 [1]  | <p>Non-coding variant allele:</p> <ul style="list-style-type: none"> <li>• CYP3A5*3 (rs776746)</li> </ul>                                                                                                                                                                                                                                                                                                                                                                                                                        | <p>Increased CYP3A5 metabolism: Hetero- or homozygous carriers of CYP3A5*1</p>                                                                                                                                                                                                                                 |
| SLCO1B1 [2] | <p>Reduced-function allele:</p> <ul style="list-style-type: none"> <li>• 521T&gt;C/*5 (rs4149056)</li> </ul>                                                                                                                                                                                                                                                                                                                                                                                                                     | <p>Decreased OATP1B1-mediated transport, e.g. of statins: Hetero- or homozygous carriers of the reduced-function allele</p>                                                                                                                                                                                    |
| VCORK1 [3]  | <p>Increased VCORK1-sensitivity:</p> <ul style="list-style-type: none"> <li>• VKORC1*2 (rs9923231)</li> </ul>                                                                                                                                                                                                                                                                                                                                                                                                                    | <p>Low-dose warfarin responders: Hetero- or homozygous carriers of VKORC1*2</p>                                                                                                                                                                                                                                |

All genotyping assays were validated and had been certified by Norwegian accreditation for routine clinical use. All variant allele analyses were performed using Taqman-based realtime PCR assays.

#### REFERENCES:

[1] Gaedigk A, Ingelman-Sundberg M, Miller NA, Leeder JS, Whirl-Carrillo M, Klein TE. The Pharmacogene Variation (PharmVar) Consortium: Incorporation of the Human Cytochrome P450 (CYP) Allele Nomenclature Database. Clin Pharmacol Ther. 2018; 103: 399-401.

[2] Kallikoski A, Niemi M. Impact of OATP transporters on pharmacokinetics. British journal of pharmacology. 2009; 158: 693-705.

[3] Owen RP, Gong L, Sagreiya H, Klein TE, Altman RB. VKORC1 pharmacogenomics summary. Pharmacogenetics and genomics. 2010; 20: 642-4.
