# Supplementary material for: Prevalence and risk factors of drug-related hospitalizations in multimorbid patients admitted to an internal medicine ward
Source: PubMed Central journal article supplement (PMC6645516; doi:10.1371/journal.pone.0220071), 2019-07-22
Supplement: pone.0220071.s003.pdf [file pone.0220071.s003.pdf]

**S3 Table. Overview over the number of times a drug was suspected to be related to hospitalization in 155 drug-related hospitalizations, ranked according to frequency (drugs associated 1 or 2 times are not included in the overview).**

| <b>Drugs</b>                                            | <b>Suspected relation with hospitalization, n</b> |
|---------------------------------------------------------|---------------------------------------------------|
| Metoprolol                                              | 39                                                |
| Bumetanide                                              | 21                                                |
| Zopiclone                                               | 15                                                |
| Insulin and insulin analogues                           | 13                                                |
| Acetylsalicylic acid                                    | 11                                                |
| Furosemide                                              |                                                   |
| Oxazepam                                                | 10                                                |
| Warfarin                                                |                                                   |
| Atorvastatin                                            | 9                                                 |
| Enalapril                                               | 8                                                 |
| Oxycodone                                               |                                                   |
| Simvastatin                                             |                                                   |
| Buprenorphine                                           | 7                                                 |
| Formoterol/budesonide                                   |                                                   |
| Escitalopram                                            |                                                   |
| Codeine/paracetamol                                     | 6                                                 |
| Ipratropium bromide                                     |                                                   |
| Isosorbide mononitrate                                  |                                                   |
| Losartan                                                |                                                   |
| Tramadol                                                |                                                   |
| Amlodipine                                              | 5                                                 |
| Bisoprolol                                              |                                                   |
| Glimepiride                                             |                                                   |
| Glyceryl trinitrate                                     |                                                   |
| Nifedipine                                              |                                                   |
| Paracetamol                                             |                                                   |
| Prednisolone                                            |                                                   |
| Ramipril                                                |                                                   |
| Salbutamol                                              |                                                   |
| Calcium, combinations with vitamin D and/or other drugs | 4                                                 |
| Citalopram                                              |                                                   |
| Digoxin                                                 |                                                   |
| Lisinopril                                              |                                                   |
| Metformin                                               |                                                   |
| Methotrexate                                            |                                                   |
| Nitrazepam                                              |                                                   |
| Pantoprazole                                            |                                                   |
| Rivaroxaban                                             |                                                   |
| Zolpidem                                                |                                                   |
| Chlorprothixene                                         | 3                                                 |
| Cortisone                                               |                                                   |
| Hydrochlorothiazide                                     |                                                   |
| Levothyroxine sodium                                    |                                                   |
| Mycophenolic acid                                       |                                                   |
| Solifenacin                                             |                                                   |
| Spirolactone                                            |                                                   |
