# Supplementary material for: Prevalence and risk factors of drug-related hospitalizations in multimorbid patients admitted to an internal medicine ward
Source: PubMed Central journal article supplement (PMC6645516; doi:10.1371/journal.pone.0220071), 2019-07-22
Supplement: pone.0220071.s004.pdf [file pone.0220071.s004.pdf]

**S4 Table. Overview of gene-drug interactions (GDIs) identified during the retrospective reviews of the reconciled drug lists in relation to the respective patients' genotype results. GDIs of potential relevance for assessments of drug-related hospitalizations (DRHs) were determined based on expected consequences of GDIs and information available in the medical records, including causes of hospitalization.**

| Gene             | Drug (*=prodrugs) | Total GDIs, n | Relevant for DRH assessments, n |
|------------------|-------------------|---------------|---------------------------------|
| CYP2C9           | Warfarin          | 19            | 2                               |
|                  | Losartan*         | 10            | 1                               |
|                  | Ibuprofen         | 5             |                                 |
|                  | Candesartan       | 4             |                                 |
|                  | Irbesartan        | 3             |                                 |
|                  | Fluvastatin       | 2             |                                 |
|                  | Diclofenac        | 2             |                                 |
|                  | Glimepiride       | 1             |                                 |
| CYP2C19          | Pantoprazole      | 58            | 2                               |
|                  | Esomeprazole      | 20            | 2                               |
|                  | Clopidogrel*      | 16            | 1                               |
|                  | Diazepam          | 11            |                                 |
|                  | Escitalopram      | 10            | 1                               |
|                  | Citalopram        | 5             | 1                               |
|                  | Omeprazole        | 3             |                                 |
|                  | Lansoprazole      | 3             |                                 |
|                  | Doxepin           | 1             |                                 |
|                  | Fluoxetine        | 1             | 1                               |
|                  | Sertraline        | 1             |                                 |
|                  | Venlafaxine       | 1             | 1                               |
|                  | CYP2D6            | Metoprolol    | 125                             |
| Codeine*         |                   | 42            | 2                               |
| Oxycodone        |                   | 19            | 1                               |
| Tramadol*        |                   | 11            | 3                               |
| Amitriptyline    |                   | 6             |                                 |
| Mirtazapine      |                   | 5             |                                 |
| Haloperidol      |                   | 3             |                                 |
| Carvedilol       |                   | 2             |                                 |
| Simvastatin      |                   | 2             | 2                               |
| Fesoterodine     |                   | 2             |                                 |
| Chlorprothixene  |                   | 2             | 2                               |
| Risperidone      |                   | 2             | 2                               |
| Mianserin        |                   | 2             |                                 |
| Tamsulosin       |                   | 2             | 1                               |
| Levomepromazine  |                   | 1             |                                 |
| Prochlorperazine |                   | 1             | 1                               |
| Zuclopenthixol   |                   | 1             | 1                               |
| Venlafaxine      |                   | 1             | 1                               |
| Donepezil        |                   | 1             |                                 |
| CYP3A5           | Simvastatin       | 17            |                                 |
|                  | Atorvastatin      | 11            |                                 |
|                  | Apixaban          | 3             |                                 |
|                  | Amlodipine        | 3             |                                 |
|                  | Rivaroxaban       | 2             |                                 |
|                  | Clopidogrel*      | 1             |                                 |
|                  | Nifedipine        | 1             |                                 |
|                  | Pravastatin       | 1             |                                 |
|                  | Vardenafil        | 1             |                                 |

|         |               |     |    |
|---------|---------------|-----|----|
|         | Fentanyl      | 1   |    |
|         | Buprenorphine | 1   |    |
|         | Zopiclone     | 1   |    |
| SLCO1B1 | Simvastatin   | 23  | 1  |
|         | Atorvastatin  | 21  | 4  |
|         | Pravastatin   | 2   |    |
|         | Fluvastatin   | 2   |    |
| VCORK   | Warfarin      | 41  | 4  |
| TOTAL   |               | 538 | 52 |

CYP = cytochrome P450
